# Supplementary material for: SICI during changing brain states: Differences in methodology can lead to different conclusions
Source: PubMed Central journal article supplement — Brain Stimul. 2020 Mar-Apr;13(2):353–6. doi: 10.1016/j.brs.2019.11.002 (PMC7790761; doi:10.1016/j.brs.2019.11.002), 2020
Supplement: mmc1.pdf [file mmc1.pdf]

## SUPPLEMENTARY MATERIALS:

**Supplementary Table 1.** Used TMS intensities, estimated RTs and mean number of valid trials averaged per condition and participant. (MSO refers to maximums stimulator output).

| Participant | TMS intensities (%MSO) |                     |                   |                      | RTs (ms) | Valid Trials / condition |
|-------------|------------------------|---------------------|-------------------|----------------------|----------|--------------------------|
|             | RMT                    | 1mV <sub>REST</sub> | 1mV <sub>WS</sub> | 1mV <sub>200ms</sub> |          |                          |
| 1           | 59                     | 79                  | 79                | 87                   | 220      | 16                       |
| 2           | 68                     | 79                  | 79                | 81                   | 264      | 17                       |
| 3           | 54                     | 60                  | 57                | 63                   | 240      | 14                       |
| 4           | 55                     | 78                  | 86                | 90                   | 215      | 17                       |
| 5           | 55                     | 70                  | 60                | 70                   | 211      | 17                       |
| 6           | 60                     | 80                  | 88                | 92                   | 227      | 12                       |
| 7           | 48                     | 60                  | 54                | 60                   | 230      | 17                       |
| 8           | 66                     | 89                  | 98                | 100                  | 205      | 16                       |
| 9           | 55                     | 70                  | 60                | 60                   | 196      | 14                       |
| 10          | 37                     | 55                  | 52                | 52                   | 226      | 17                       |
| 11          | 62                     | 78                  | 75                | 77                   | 207      | 17                       |
| 12          | 42                     | 66                  | 59                | 59                   | 198      | 15                       |
| 13          | 48                     | 63                  | 54                | 60                   | 215      | 16                       |
| 14          | 48                     | 61                  | 58                | 58                   | 238      | 15                       |
| 15          | 42                     | 52                  | 50                | 50                   | 205      | 16                       |
| 16          | 50                     | 58                  | 61                | 61                   | 239      | 14                       |
| 17          | 57                     | 80                  | 80                | 80                   | 218      | 16                       |
| 18          | 69                     | 78                  | 80                | 82                   | 204      | 17                       |
| 19          | 80                     | 100                 | 100               | 100                  | 214      | 13                       |
| 20          | 35                     | 42                  | 40                | 40                   | 230      | 15                       |
| 21          | 47                     | 58                  | 56                | 53                   | 210      | 15                       |
| 22          | 44                     | 52                  | 55                | 54                   | 207      | 17                       |
| 23          | 55                     | 62                  | 63                | 63                   | 257      | 15                       |
| 24          | 40                     | 48                  | 55                | 72                   | 243      | 13                       |
| Mean ± SEM  | 53 ± 2                 | 67 ± 3              | 67 ± 3            | 69 ± 3               | 222 ± 4  | 15 ± 1                   |

**Supplementary Table 2.** MEP amplitudes to 1mV TMS and pre-stimulus EMG levels.

| Subj.      | 1mV TMS responses (mV) |            |               | Pre-TMS EMG noise (mV) |            |               |
|------------|------------------------|------------|---------------|------------------------|------------|---------------|
|            | <i>Rest</i>            | <i>WS</i>  | <i>RT-200</i> | <i>Rest</i>            | <i>WS</i>  | <i>RT-200</i> |
| 1          | 0.55                   | 1.72       | 1.41          | 0.02                   | 0.02       | 0.02          |
| 2          | 1.03                   | 1.08       | 0.92          | 0.03                   | 0.03       | 0.03          |
| 3          | 0.77                   | 1.06       | 1.27          | 0.03                   | 0.03       | 0.03          |
| 4          | 0.81                   | 0.78       | 0.70          | 0.01                   | 0.02       | 0.02          |
| 5          | 0.81                   | 0.98       | 1.08          | 0.01                   | 0.02       | 0.02          |
| 6          | 0.53                   | 1.01       | 0.75          | 0.06                   | 0.05       | 0.05          |
| 7          | 0.94                   | 1.26       | 1.74          | 0.03                   | 0.02       | 0.02          |
| 8          | 0.56                   | 1.32       | 1.14          | 0.02                   | 0.03       | 0.03          |
| 9          | 1.26                   | 0.62       | 0.75          | 0.02                   | 0.02       | 0.02          |
| 10         | 0.60                   | 0.98       | 0.96          | 0.01                   | 0.02       | 0.02          |
| 11         | 0.56                   | 1.29       | 2.00          | 0.02                   | 0.02       | 0.02          |
| 12         | 1.23                   | 0.66       | 0.58          | 0.01                   | 0.02       | 0.02          |
| 13         | 1.73                   | 0.51       | 0.80          | 0.02                   | 0.03       | 0.03          |
| 14         | 0.78                   | 1.02       | 0.81          | 0.02                   | 0.02       | 0.02          |
| 15         | 1.35                   | 1.03       | 1.78          | 0.02                   | 0.02       | 0.02          |
| 16         | 1.20                   | 2.04       | 1.35          | 0.03                   | 0.07       | 0.07          |
| 17         | 1.03                   | 0.81       | 0.91          | 0.02                   | 0.03       | 0.03          |
| 18         | 0.80                   | 1.23       | 1.22          | 0.02                   | 0.02       | 0.02          |
| 19         | 0.34                   | 0.42       | 0.46          | 0.02                   | 0.02       | 0.02          |
| 20         | 1.35                   | 1.45       | 1.38          | 0.02                   | 0.03       | 0.03          |
| 21         | 1.16                   | 1.18       | 0.76          | 0.02                   | 0.03       | 0.04          |
| 22         | 0.97                   | 0.84       | 0.74          | 0.02                   | 0.03       | 0.03          |
| 23         | 0.95                   | 0.78       | 0.76          | 0.02                   | 0.03       | 0.03          |
| 24         | 1.10                   | 1.42       | 2.32          | 0.02                   | 0.05       | 0.05          |
| Mean $\pm$ | 0.93 $\pm$             | 1.06 $\pm$ | 1.11 $\pm$    | 0.02 $\pm$             | 0.03 $\pm$ | 0.03 $\pm$    |
| SEM        | 0.07                   | 0.08       | 0.10          | 0.00                   | 0.00       | 0.00          |

**Supplementary Table 3.** Paired comparisons of SICI values obtained at *Rest*, *WS* and *RT-200* for the different CS used and for SICI<sub>MAX</sub> and SICI<sub>MAXREST</sub>.

| CS-intensity<br>(%RMT)  | Paired comparisons (p-values) |                             |                           |
|-------------------------|-------------------------------|-----------------------------|---------------------------|
|                         | <i>Rest</i> v <i>WS</i>       | <i>Rest</i> v <i>RT-200</i> | <i>WS</i> v <i>RT-200</i> |
| 60                      | 0.063                         | 0.163                       | 0.415                     |
| 70                      | 0.356                         | 0.214                       | 0.750                     |
| 80                      | <b>0.002</b>                  | <b>0.030</b>                | 0.067                     |
| 90                      | <b>0.009</b>                  | <b>0.018</b>                | 0.089                     |
| 100                     | <b>0.001</b>                  | <b>0.000</b>                | 0.858                     |
| SICI <sub>MAX</sub>     | <b>0.000</b>                  | <b>0.006</b>                | 0.216                     |
| SICI <sub>MAXREST</sub> | 0.535                         | 0.081                       | <b>0.025</b>              |
